# Supplementary material for: An FGFR1-Binding Peptide Modified Liposome for siRNA Delivery in Lung Cancer
Source: MDPI journal article supplement (doi:10.3390/ijms23158380), 2022-07-29
Supplement: s1 [file s1]

## Supplementary Information

### A FGFR1-binding peptide modified liposome for siRNA delivery in lung cancer

*Zhipeng Dong<sup>1</sup>, Yunxue Yin<sup>1</sup>, Jun Luo<sup>1</sup>, Bingxia Li<sup>1</sup>, Fangning Lou<sup>1</sup>, Qiyan Wang<sup>1</sup>, Qingfa Zhou<sup>\*1</sup>, Baofen Ye<sup>\*1</sup>, Yue Wang<sup>\*1</sup>*

1. Key Laboratory of Biomedical Functional Materials, School of Sciences, China Pharmaceutical University, Nanjing 211198, Jiangsu Province, China. E-mail: zwy\_1115@126.com

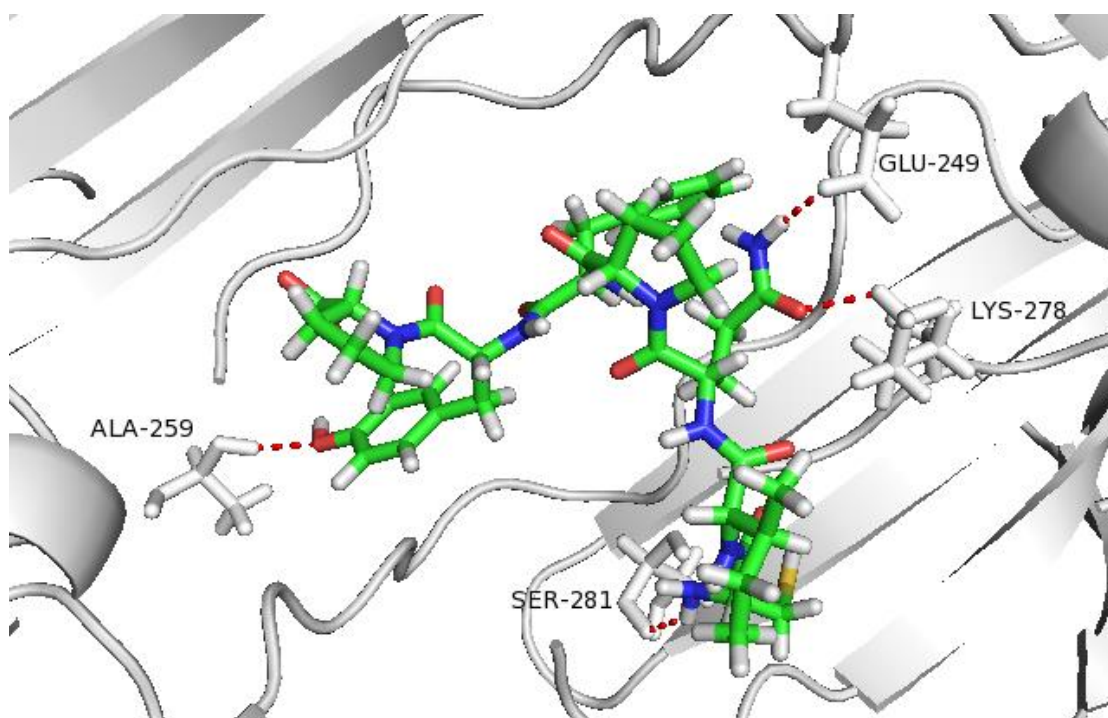

Figure S1. Hydrogen bond interaction of FGFR1 with CP7 and hydrogen bonds are labeled with red lines.
